# Supplementary material for: Pigmentation and TYRP1 expression are mediated by zinc through the early secretory pathway-resident ZNT proteins
Source: PubMed Central journal article supplement (PMC10113262; doi:10.1038/s42003-023-04640-5), 2023-04-18
Supplement: 42003_2023_4640_MOESM2_ESM.pdf [file 42003_2023_4640_MOESM2_ESM.pdf]

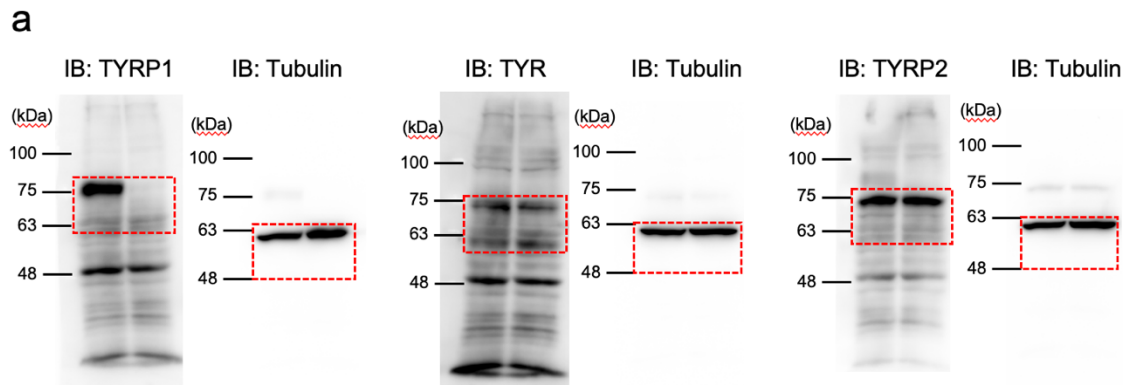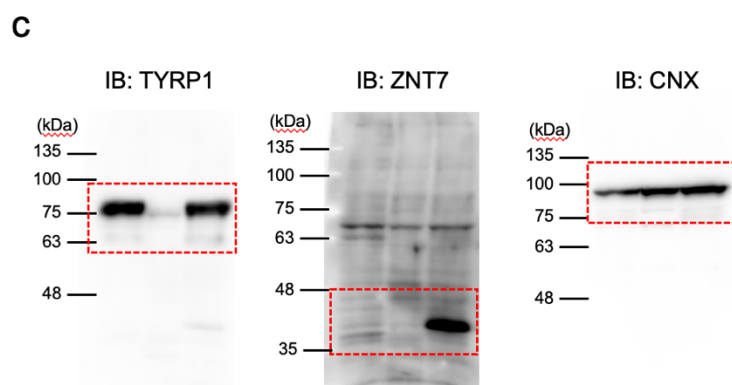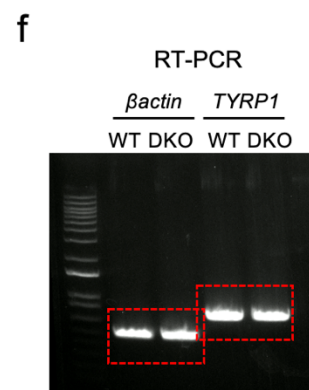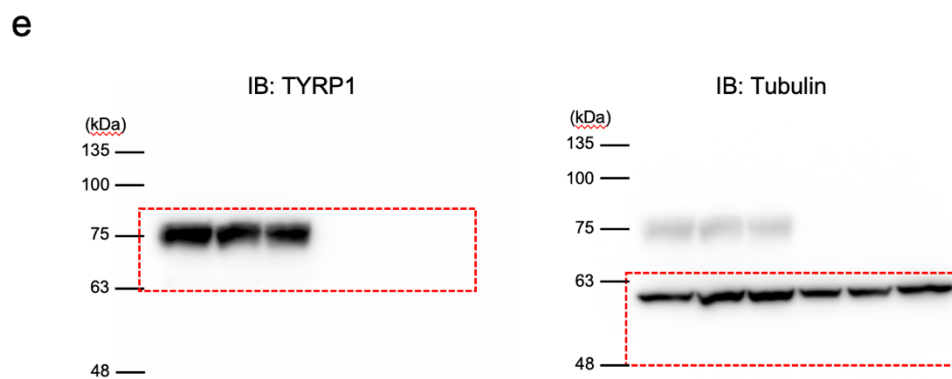

**Supplementary Figure 1. Full-length immunoblot and RT-PCR images used in Figure 3.** The panel used is boxed. In a, c, and e, the same blot was used sequentially (after stripping) for detection in each composite figure. The molecular weights of the marker proteins are indicated on the left of the immunoblot images.

**a**

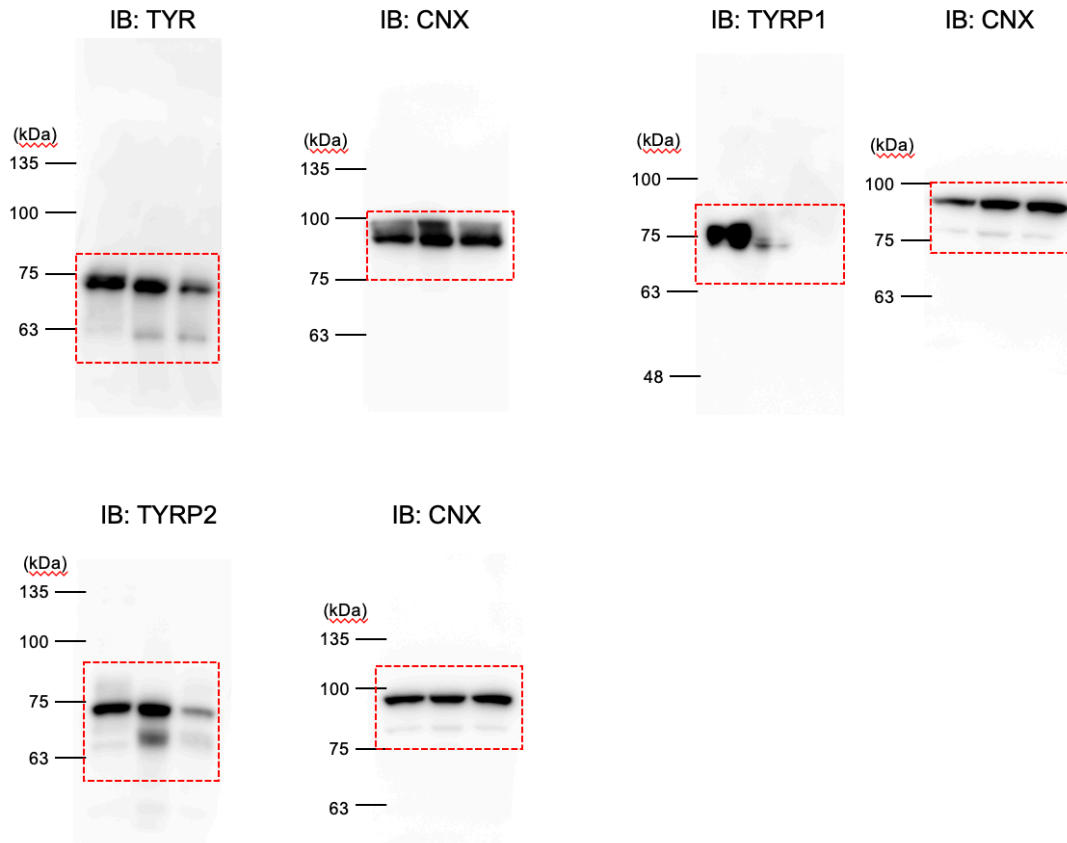

**Supplementary Figure 2. Full-length immunoblot images used in Figure 4.** The panel used is boxed. The same blot was used sequentially (after stripping) for detection in each composite figure. The molecular weights of the marker proteins are indicated on the left of the immunoblot images.

**a**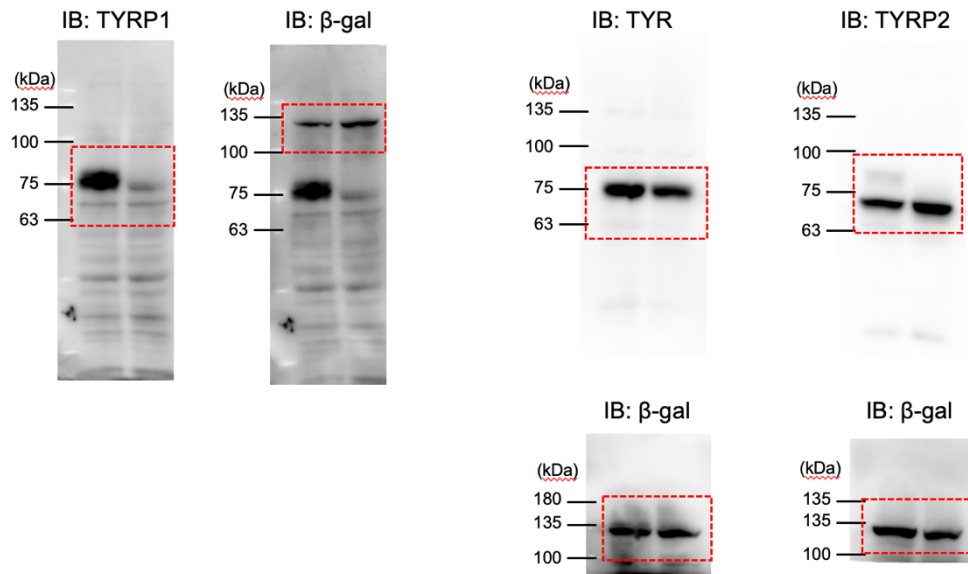**c**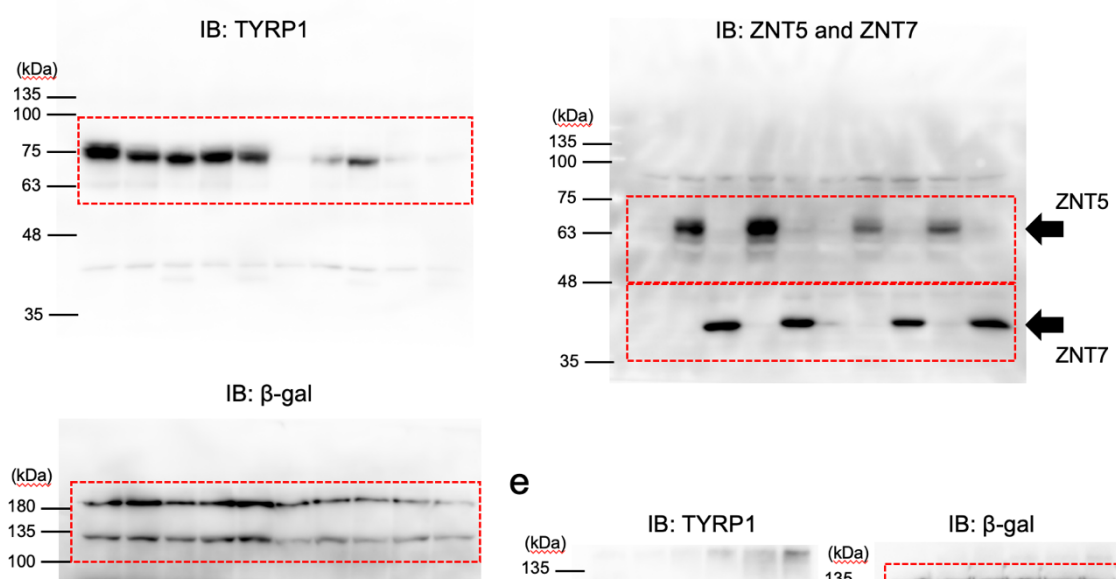**e**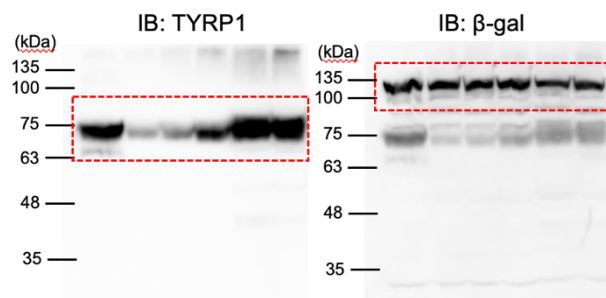

**Supplementary Figure 3. Full-length immunoblot images used in Figure 5.** The panel used is boxed. The same blot was used sequentially (after stripping) for detection in each composite figure. The molecular weights of the marker proteins are indicated on the left of the immunoblot images.

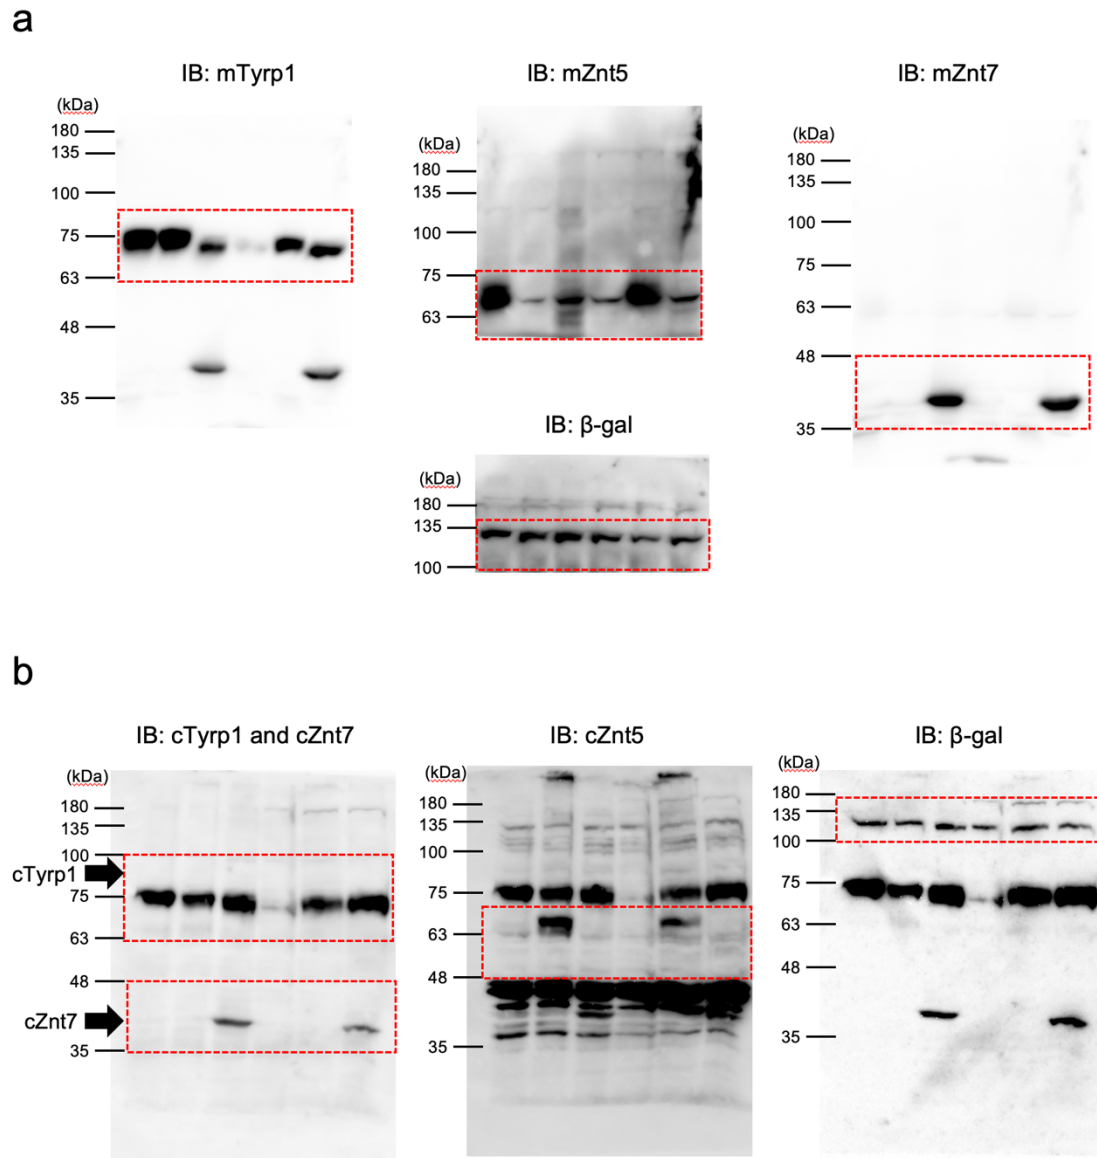

**Supplementary Figure 4. Full-length immunoblot images used in Figure 6.** The panel used is boxed. The same blot was used sequentially (after stripping) for detection in each composite figure. The molecular weights of the marker proteins are indicated on the right of the immunoblot images.

**a**

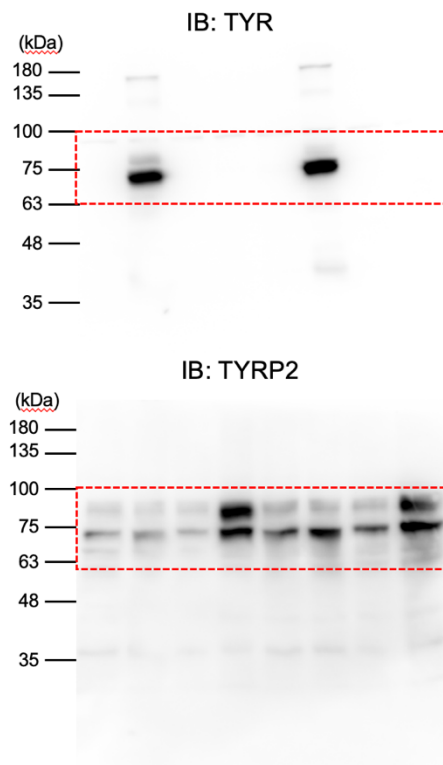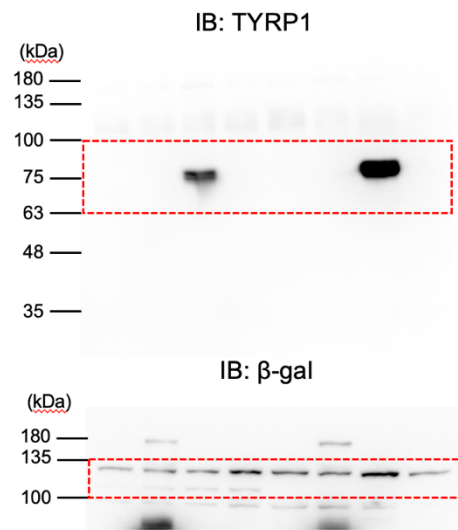

**c**

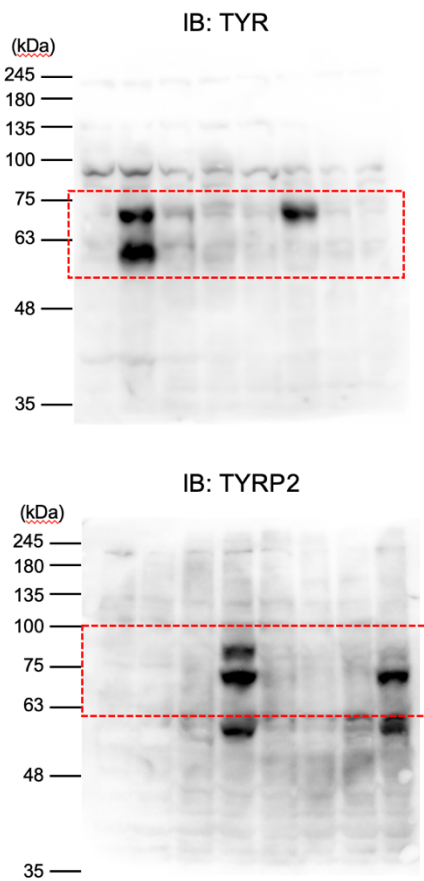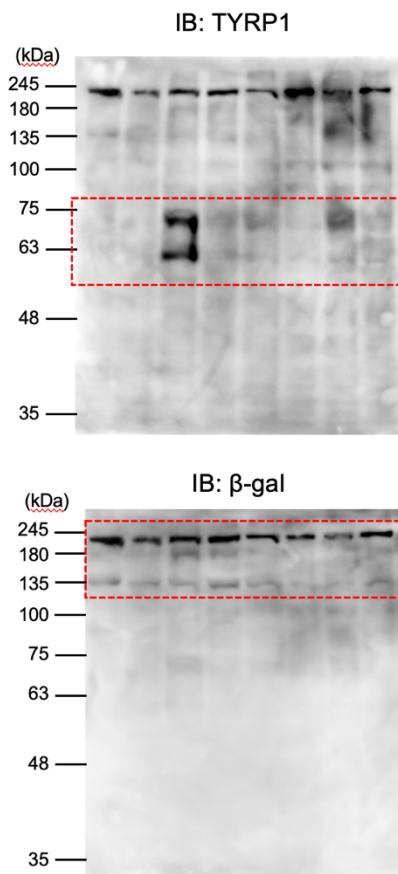

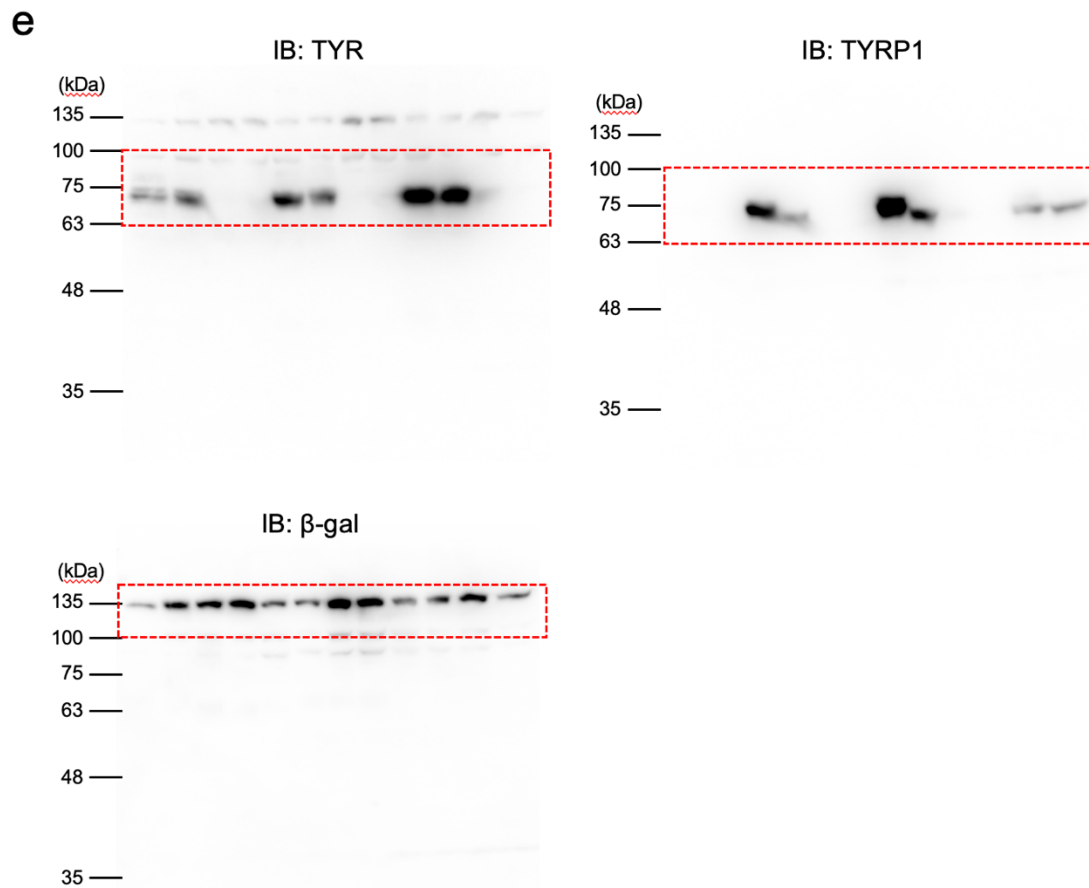

**Supplementary Figure 5. Full-length immunoblot images used in Figure 7.** The panel used is boxed. The same blot was used sequentially (after stripping) for detection in each composite figure. The molecular weights of the marker proteins are indicated on the right of the immunoblot images.

**Supplementary Table 1. Primers used for genomic PCR to confirm gene editing in Mewo and SK-MEL-2 cells.**

| <b>Gene</b>  | <b>Forward primer (5' to 3')</b>   | <b>Reverse primer (5' to 3')</b>   |
|--------------|------------------------------------|------------------------------------|
| <i>ZNT5</i>  | TGTGTGAAATAGGGTTTCTAATGT<br>AAGTGG | TAATCTTTGAGCTTAATTCCATTC<br>AGTATT |
| <i>ZNT7</i>  | GTGAAGAAAGGAGCATGTGAACT<br>G       | CAGAGGTAGGTAACAAAGGTAGG<br>AC      |
| <i>TYRP1</i> | CTTCAAGGCCATGTGGCCAATGT<br>AA      | AAGATTCTGAAAGGGTCTTCCCA<br>GC      |
| <i>ATP7A</i> | TCTGTATTCTGTAATGGGGCT              | AGCTGAAAATAAACCTTGCCTG             |

**Supplementary Table 2. Primers used in RT-PCR analysis.**

| <b>Gene</b>   | <b>Forward primer (5' to 3')</b>   | <b>Reverse primer (5' to 3')</b>   |
|---------------|------------------------------------|------------------------------------|
| <i>TYRP1</i>  | GCTGCCTGTGACCAGAGGGTTCTC<br>ATAGTC | GGTCATACTTTCCCGTGGGGTCACT<br>GTAAC |
| <i>βACTIN</i> | CATGTACGTTGCTATCCAGGCTGT<br>GCTATC | GTCATACTCCTGCTTGCTGATCCAC<br>ATCTG |
